# Supplementary material for: Representation of iron aerosol size distributions is critical in evaluating atmospheric soluble iron input to the ocean
Source: Copernicus journal article supplement (doi:10.5194/egusphere-2024-1454), 2024-06-18
Supplement: Supplementary file 1 [file egusphere-2024-1454-supplement.pdf]

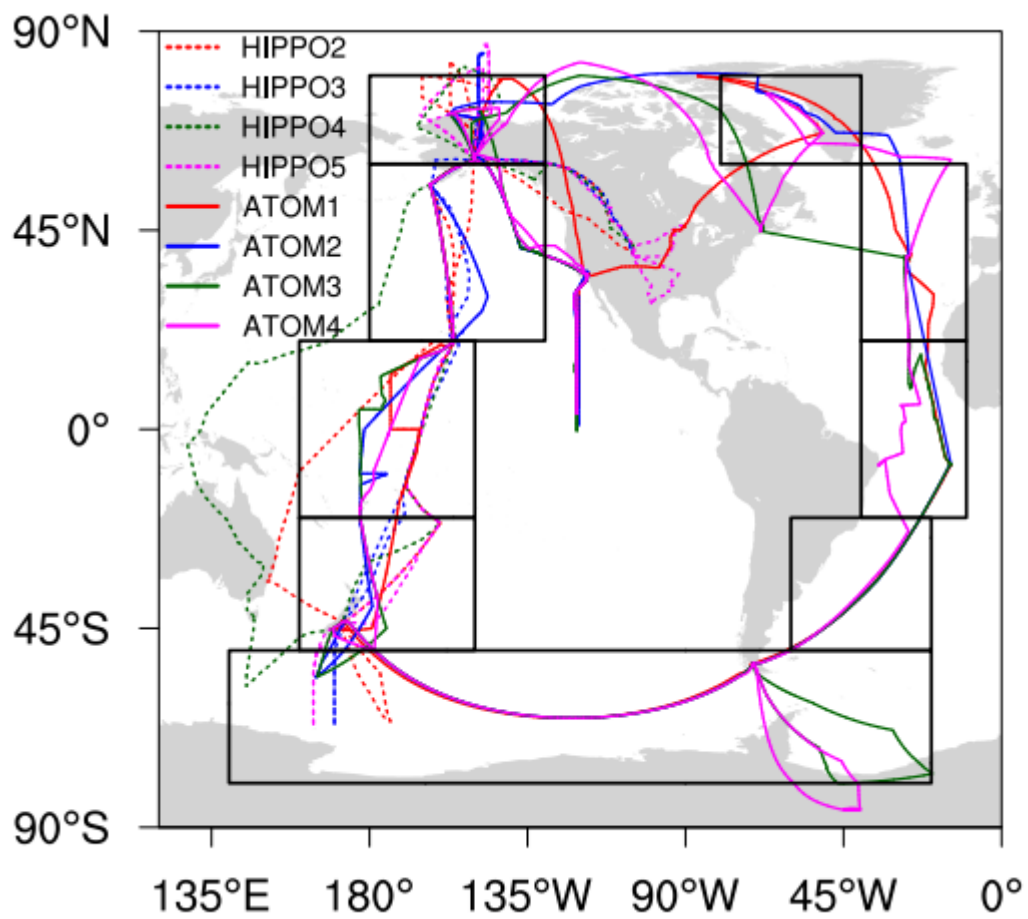

**Fig. S1.** Flight routes from eight deployments of HIPPO and ATOM campaigns. The observations are divided into nine latitude bands (shown in black boxes) for comparison with model results.

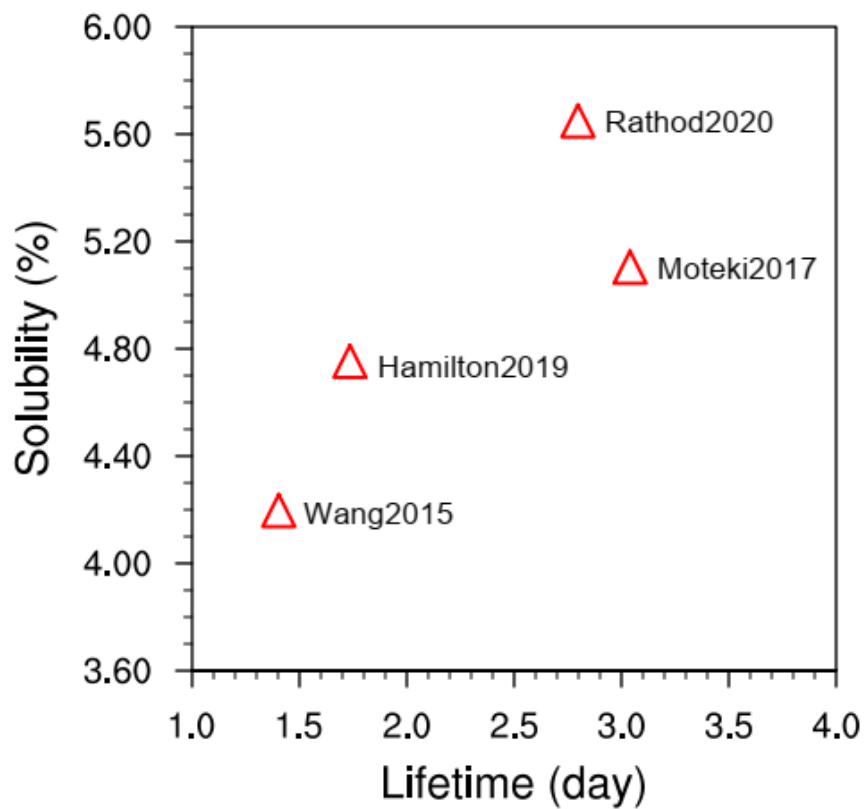

**Fig. S2.** Ratios of anthropogenic and total iron deposition in the fine-sized case to those of coarse-sized case.

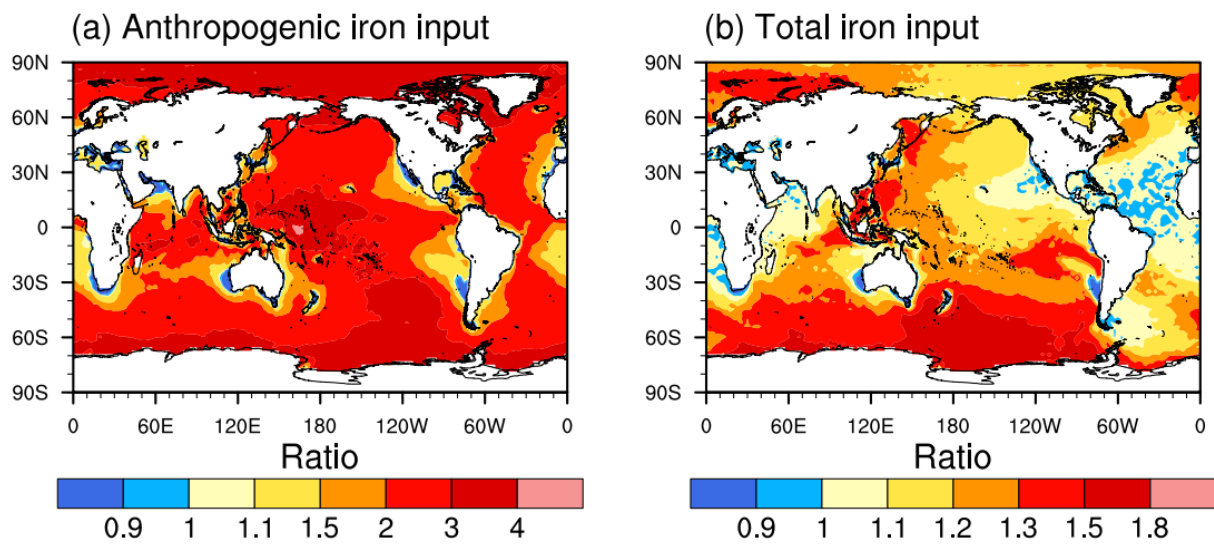

**Fig. S3.** Ratios of anthropogenic and total iron deposition in the fine-sized case to those of coarse-sized case.

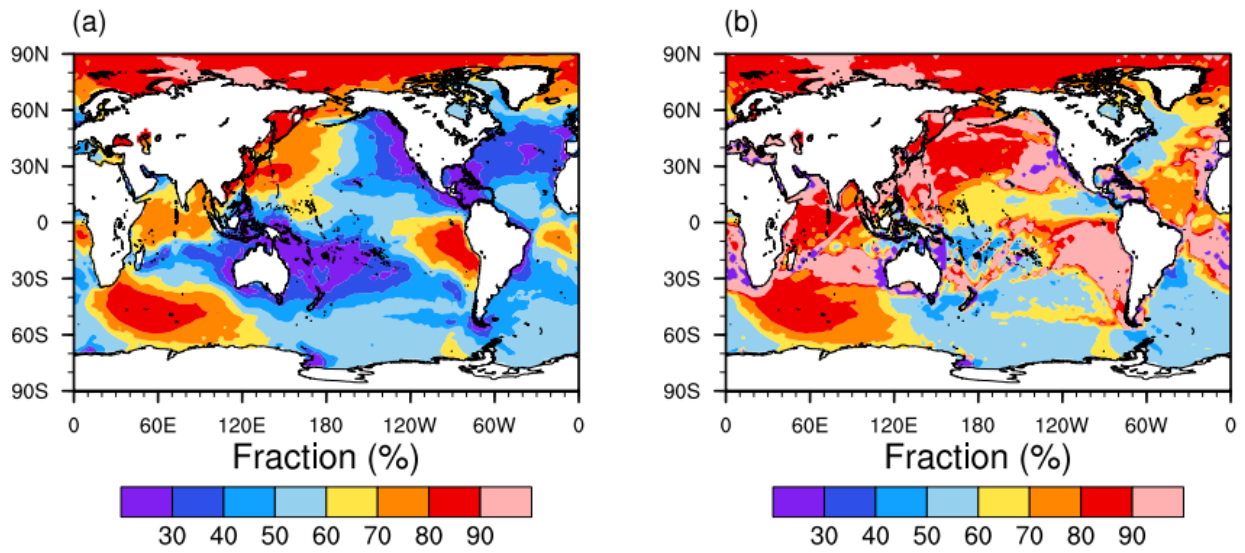

**Fig. S4.** Fractional contributions of aerosol aging processes to soluble iron deposition in the fine-sized case (a) and to the differences between the fine-sized and coarse-sized cases (b). The fractions are derived by comparing the differences between the cases with and without aerosol aging processes for both the fine-sized and coarse-sized cases.

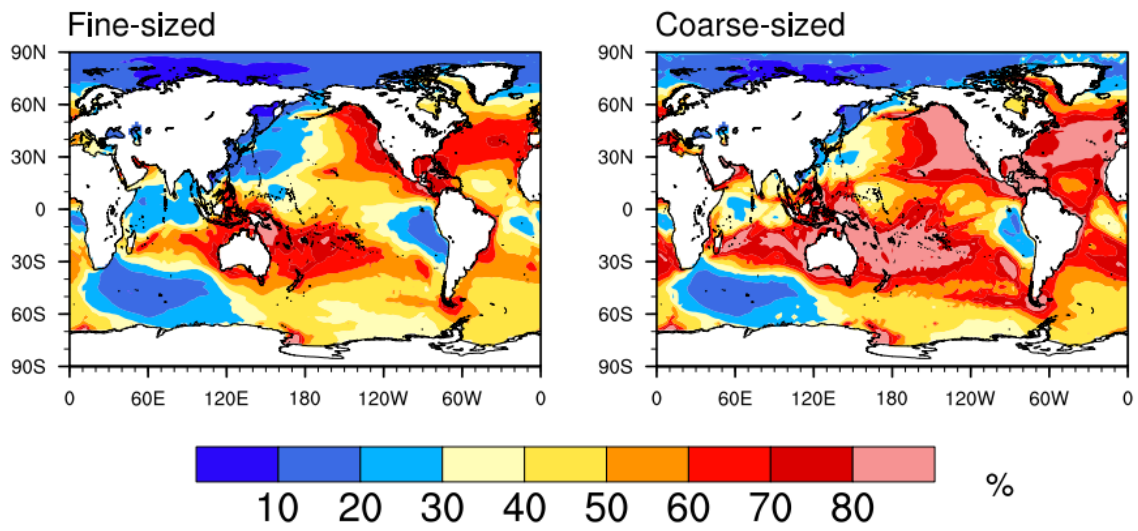

**Fig. S5.** Contribution of iron sulfates to total soluble iron deposition originating from anthropogenic sources. Here, results of the simulations with the fine-sized and coarse-sized iron emissions are shown for comparison.

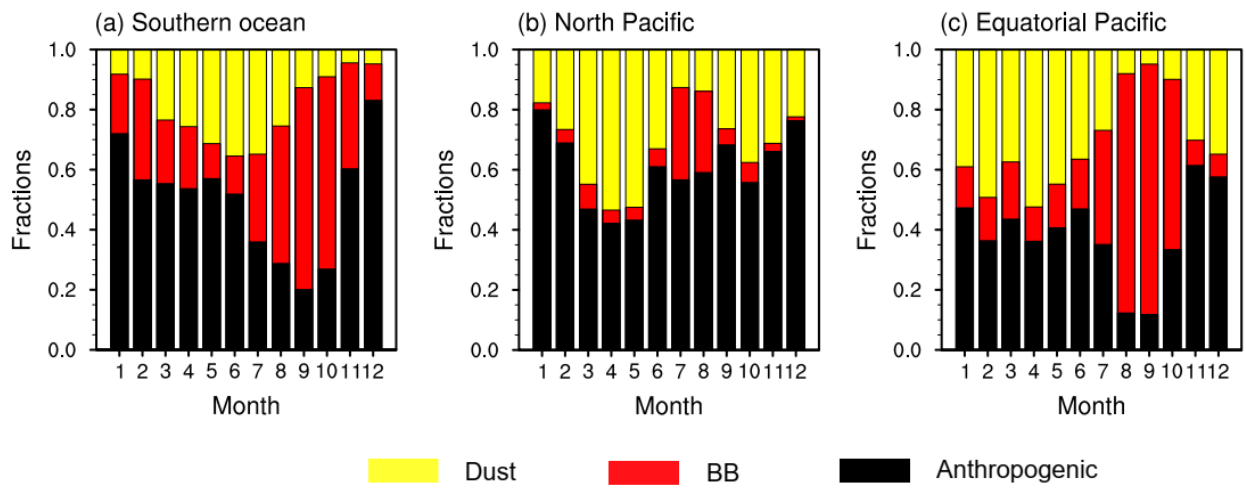

**Fig. S6.** Source appointments of monthly soluble iron deposition over three ocean basins. The results are the averages of all simulation years (2009-2011 and 2016-2018).
